# Supplementary material
Source: PubMed Central journal article supplement (PMC3795521)
Supplement: NIHMS518138-supplement-supp_data.pdf [file NIHMS518138-supplement-supp_data.pdf]

## Supplementary Figures and tables

**Supplementary Table 1: Diet characteristics**

| Diets                | AIN-93G     |             | Ctrl Diet      |             | EPA-FFA 2.5%   |             | EPA-FFA 5%     |             |
|----------------------|-------------|-------------|----------------|-------------|----------------|-------------|----------------|-------------|
|                      | gm%         | kcal%       | gm%            | kcal%       | gm%            | kcal%       | gm%            | kcal%       |
| Protein              | 20          | 20          | 20             | 20          | 20             | 20          | 20             | 20          |
| Carbohydrate         | 64          | 64          | 64             | 64          | 64             | 64          | 64             | 64          |
| Fat                  | 7           | 16          | 7              | 16          | 7              | 16          | 7              | 16          |
| Total                |             | 100         |                | 100         |                | 100         |                | 100         |
| Kcal/gm              | 4.0         |             | 4.0            |             | 4.0            |             | 4.0            |             |
| Ingredient           | gm          | kcal        | gm             | kcal        | gm             | kcal        | gm             | kcal        |
| Casein               | 200         | 800         | 200            | 800         | 200            | 800         | 200            | 800         |
| L-Cystine            | 3           | 12          | 3              | 12          | 3              | 12          | 3              | 12          |
| Corn Starch          | 397.486     | 1589.944    | 397.486        | 1589.944    | 397.486        | 1589.944    | 397.486        | 1589.944    |
| Maltodextrin 10      | 132         | 528         | 132            | 528         | 132            | 528         | 132            | 528         |
| Sucrose              | 100         | 400         | 100            | 400         | 100            | 400         | 100            | 400         |
| Cellulose, BW200     | 50          | 0           | 50             | 0           | 50             | 0           | 50             | 0           |
| <i>Soybean Oil</i>   | <i>70</i>   | <i>630</i>  | <i>0</i>       | <i>0</i>    | <i>0</i>       | <i>0</i>    | <i>0</i>       | <i>0</i>    |
| <i>Corn Oil</i>      | <i>0</i>    | <i>0</i>    | <i>70</i>      | <i>630</i>  | <i>45</i>      | <i>405</i>  | <i>20</i>      | <i>180</i>  |
| <i>EPA</i>           | <i>0</i>    | <i>0</i>    | <i>0</i>       | <i>0</i>    | <i>25</i>      | <i>225</i>  | <i>50</i>      | <i>450</i>  |
| t-Buthylhydroquinone | 0.014       | 0           | 0.014          | 0           | 0.014          | 0           | 0.014          | 0           |
| Mineral Mix S10022G  | 35          | 0           | 35             | 0           | 35             | 0           | 35             | 0           |
| Vitamin Mix V10037   | 10          | 40          | 10             | 40          | 10             | 40          | 10             | 40          |
| Choline Bitartrate   | 2.5         | 0           | 2.5            | 0           | 2.5            | 0           | 2.5            | 0           |
| FD&C Yellow Dye #5   | 0           | 0           | 0              | 0           | 0              | 0           | 0              | 0           |
| FD&C Red Dye #40     | 0           | 0           | 0.025          | 0           | 0              | 0           | 0.05           | 0           |
| FD&C blue Dye #1     | 0           | 0           | 0.025          | 0           | 0.05           | 0           | 0              | 0           |
| <b>Total</b>         | <b>1000</b> | <b>4000</b> | <b>1000.05</b> | <b>4000</b> | <b>1000.05</b> | <b>4000</b> | <b>1000.05</b> | <b>4000</b> |

**Vitamin Mix V10037 (used at 10 gm/kg diet). Amount in 10 gm:** Vitamin A Palmitate 4,000 IU; Vitamin D3 1,000 IU; Vitamin E Acetate 75 IU; Phylloquinone 0.75 mg; Biotin 0.2 mg; Cyancocobalamin 25 ug; Folic Acid 2 mg; Nicotinic Acid 30 mg; Calcium Pantothenate 16 mg; Pyridoxine-HCl 7 mg; Riboflavin 6 mg; Thiamin HCl 6 mg; Sucrose 9.7192

**Mineral Mix S10022G (used at 35 gm/kg diet). Amount per 1000 gm of mix:** Calcium Carbonate (40% Ca) 357 gm; Potassium Phosphate Monobasic (28.7% K, 22.8% P) 196 gm; Potassium Citrate(36.2% K) 70.78 gm; Potassium Sulfate (44.9% K, 18.4% S) 46.6 gm; Magnesium Oxide (60.3% Mg) 24 gm; Sodium Chloride (39.3% Na, 60.7% Cl) 74 gm; Cupric Carbonate (57.5% Cu) 0.3 gm; Potassium Iodate (59.3% I) 0.01gm; Ferric Citrate (21.2% Fe) 6.06 gm; Manganous Carbonate (47.8% Mn) 0.63gm; Sodium Selenate (41.8% Se) 0.01025 gm; Zinc Carbonate (52.1% Zn) 1.65 gm; Chromium K Sulfate 0.275 gm; Ammonium Molybdate 0.00795 gm; Sodium Silicate 1.45 gm; Lithium Chloride 0.0174 gm; Boric Acid 0.0815 gm; Sodium Fluoride 0.0635 gm; Nickel Carbonate 0.0318 gm; Ammonium Vanadate 0.0066 gm; Sucrose 221.026 gm.

**Supplementary Table 2. Relative weight gain (in grams) over 12 weeks (T-01 to T-12, weeks 1-12) (mean±SD)**

| Time period | Apc <sup>Min/+</sup> mice |              |             | Wild- type mice |              |            |
|-------------|---------------------------|--------------|-------------|-----------------|--------------|------------|
|             | Ctrl                      | EPA-FFA 2.5% | EPA-FFA 5%  | Ctrl            | EPA-FFA 2.5% | EPA-FFA 5% |
| T-01        | 7.85± 4.09                | 0.44± 3.04   | -2.00±1.70  | 3.38±3.45       | -0.27±2.74   | -2.07±3.89 |
| T-02        | 10.20 ±4.63               | 11.51± 1.18  | 2.44±3.68   | 13.41± 6.84     | 8.36±5.73    | 3.68±5.61  |
| T-03        | 16.52± 5.60               | 11.78 ±2.73  | 8.96±3.58   | 23.29± 10.57    | 15.40±6.67   | 4.31±5.36  |
| T-04        | 19.34 ±5.19               | 20.03 2.66   | 6.12±3.65   | 27.05± 13.49    | 15.84±6.29   | 2.68±3.51  |
| T-05        | 19.96± 7.32               | 20.35 ±2.72  | 14.97±5.13  | 33.77± 14.61    | 22.11±7.80   | 11.91±6.69 |
| T-06        | 24.28± 10.59              | 24.50± 4.57  | 15.97±4.73  | 34.73± 15.83    | 22.44±8.37   | 12.62±6.46 |
| T-07        | 25.39± 9.84               | 28.69± 4.16  | 19.95±6.08  | 37.83± 16.40    | 26.54±10.44  | 16.98±8.72 |
| T-08        | 24.83± 11.13              | 25.51 ±5.32  | 23.71±7.62  | 39.47± 14.31    | 29.82±9.16   | 20.60±6.78 |
| T-09        | 24.34± 14.06              | 31.87 ±5.67  | 20.34±7.44  | 40.10± 14.10    | 27.24±9.90   | 17.83±8.59 |
| T-10        | 20.36± 15.86              | 36.10± 3.83  | 27.91±8.00  | 47.61± 13.26    | 34.39±9.25   | 26.94±9.06 |
| T-11        | 15.10± 13.47              | 36.78 ±3.89  | 31.16±10.89 | 52.45± 13.04    | 36.63±8.23   | 28.57±8.50 |
| T-12        | 12.20± 13.91              | 39.19± 4.87  | 33.02±11.59 | 52.15± 12.33    | 38.03±8.16   | 28.48±8.34 |

**Supplementary table 3. Pairwise correlation analysis of mucosal fatty acid content**

| Variable | Vs. variable | Correlation | Lower 95% | Upper 95% | <i>p</i> |
|----------|--------------|-------------|-----------|-----------|----------|
| DPA      | AA           | -0.9060     | -0.9589   | -0.7920   | <.0001   |
| EPA      | AA           | -0.9053     | -0.9586   | -0.7907   | <.0001   |
| DHA      | Linoleic     | -0.5939     | -0.8045   | -0.2505   | 0.0022   |
| DPA      | Linoleic     | -0.5915     | -0.8033   | -0.2471   | 0.0023   |
| DHA      | AA           | -0.5861     | -0.8003   | -0.2393   | 0.0026   |
| EPA      | Linoleic     | -0.4730     | -0.7360   | -0.0860   | 0.0196   |
| AA       | Linoleic     | 0.4577      | 0.0667    | 0.7269    | 0.0245   |
| DPA      | EPA          | 0.9395      | 0.8633    | 0.9738    | <.0001   |
| DHA      | DPA          | 0.7168      | 0.4408    | 0.8689    | <.0001   |
| DHA      | EPA          | 0.7100      | 0.4296    | 0.8655    | 0.0001   |

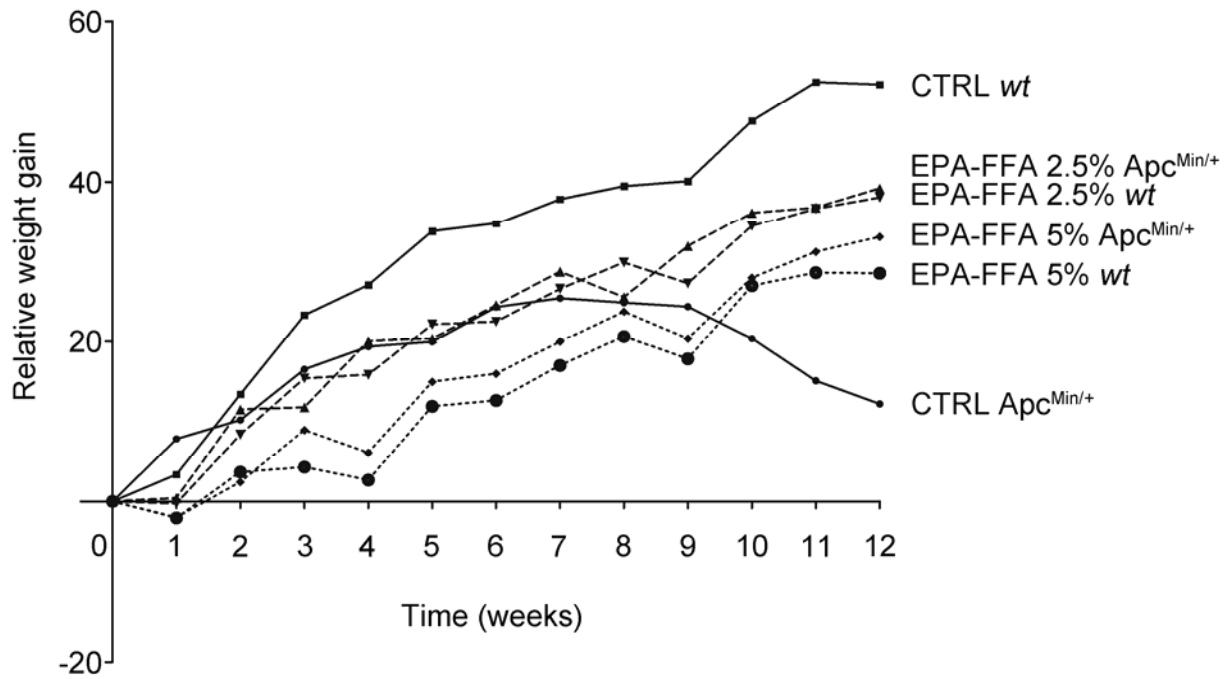

**Supplementary Figure 1.** Effect of EPA-FFA dietary supplementation on body weight in  $Apc^{Min/+}$  and corresponding *wild-type* mice. EPA-FFA diets protected from the weight loss observed in  $Apc^{Min/+}$  animals fed Ctrl diet.

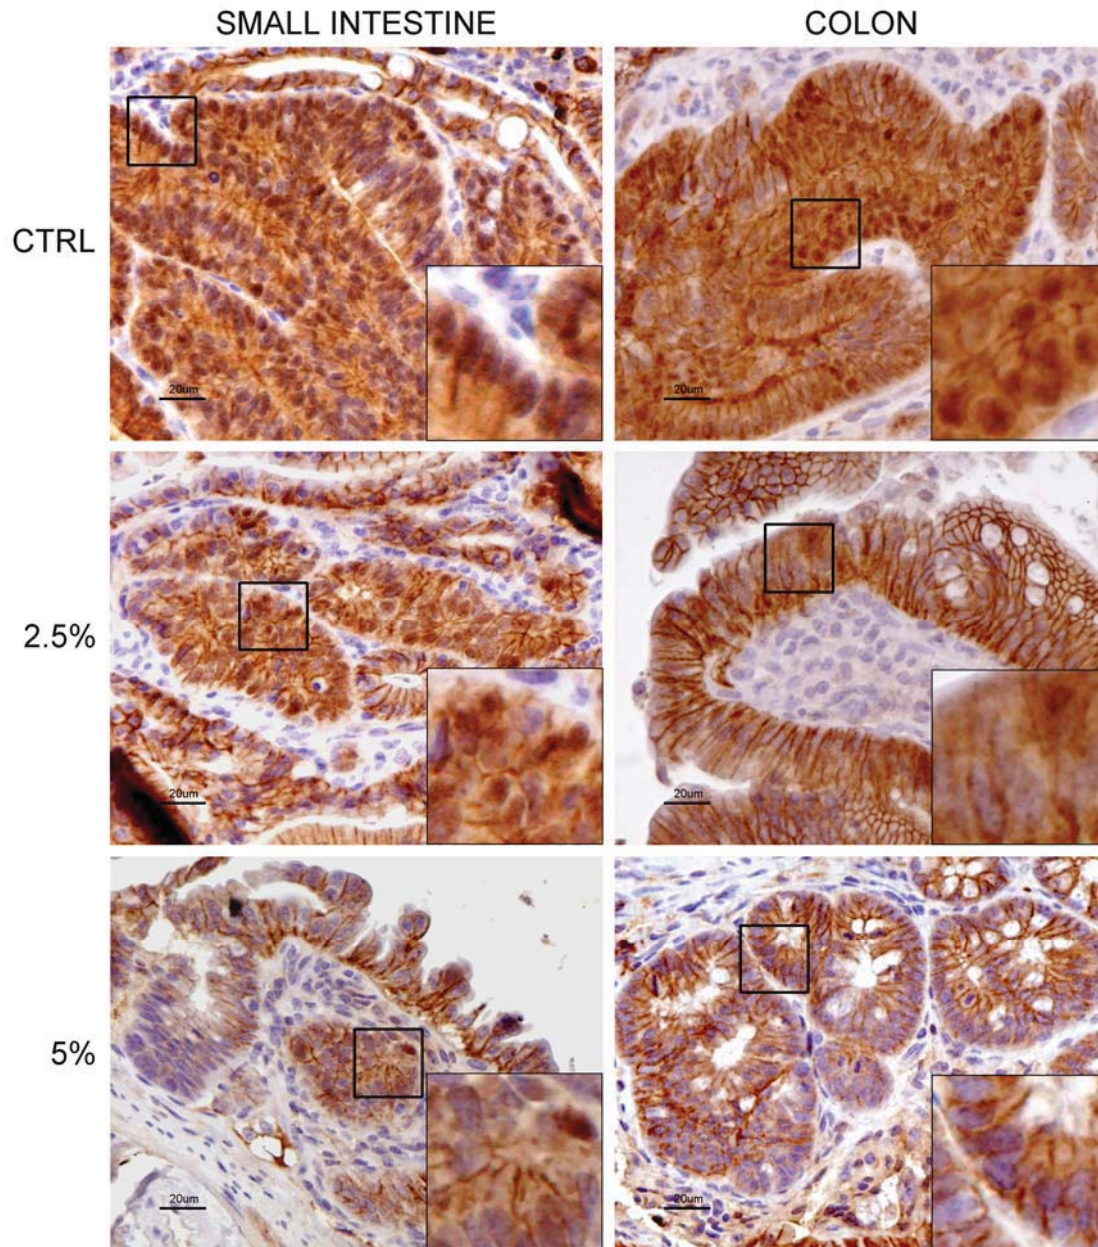

**Supplementary Figure 2.** Representative  $\beta$ -catenin IHC in dysplastic tissues from the small intestines and colons of  $Apc^{Min/+}$  mice. In the EPA-FFA treated groups, reduced  $\beta$ -catenin nuclear translocation was found in the small intestine, while the absence of nuclear staining was observed in the colon.

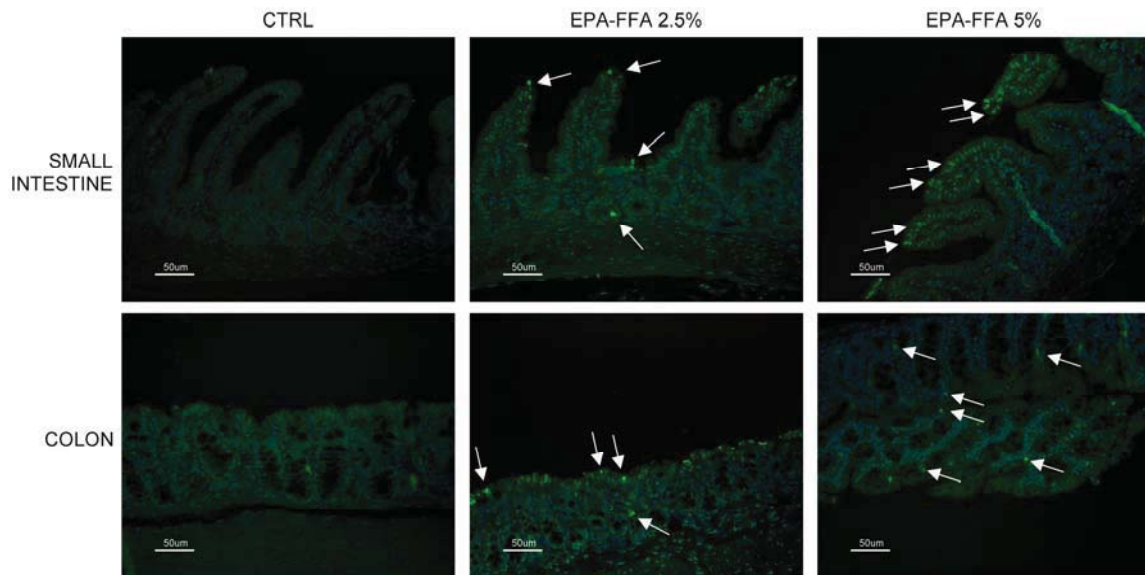

**Supplementary Figure 3.** EPA-FFA enhances apoptosis. Representative TUNEL Assays in tissues from small intestine and colon of  $Apc^{Min/+}$  mice. An increase in apoptosis was observed in the small intestine and colon of animals fed EPA-FFA 2.5% and 5%. Arrows indicate TUNEL positive cells.
